# Supplementary material for: Untargeted and Targeted Blood Lipidomic Signature Profile of Gestational Alcohol Exposure
Source: MDPI journal article supplement (doi:10.3390/nu15061411), 2023-03-15
Supplement: s1 [file s1]

Supplementary Materials

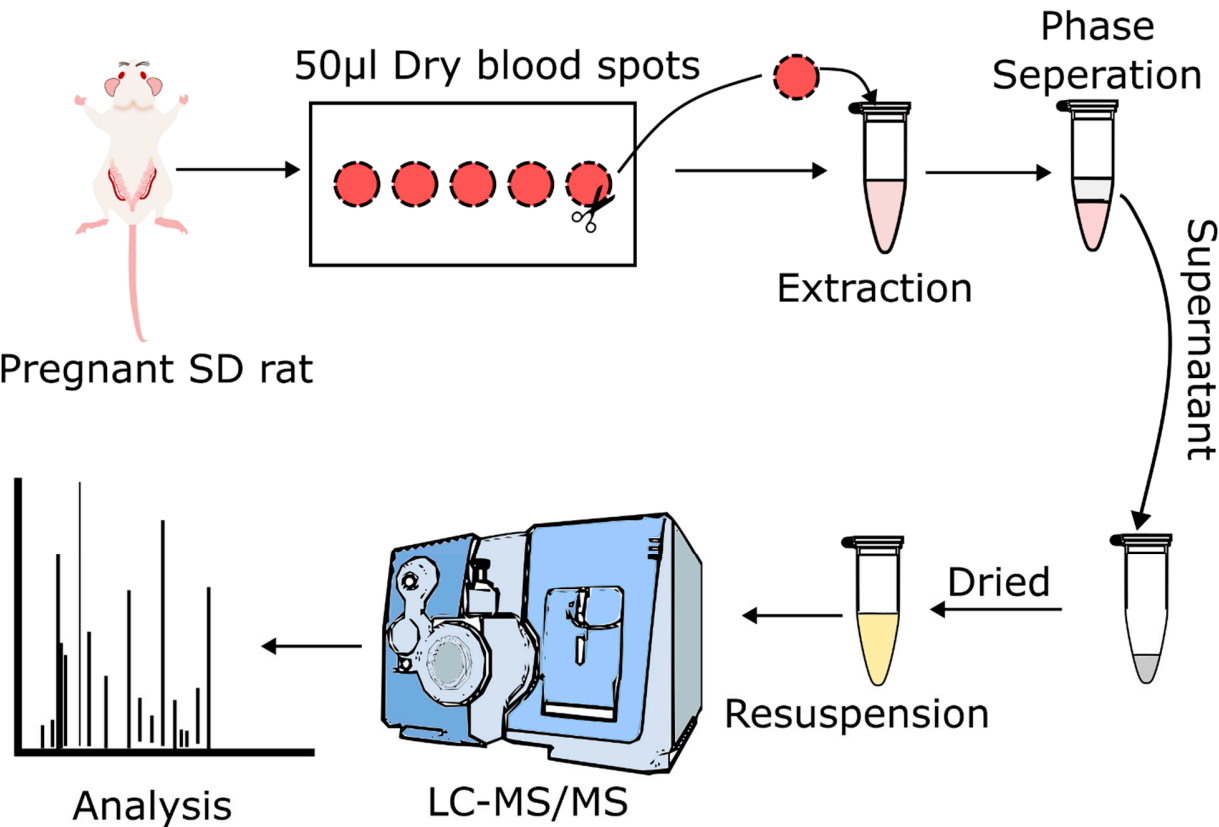

**Figure S1.** Schematic overview the lipidomic procedure.

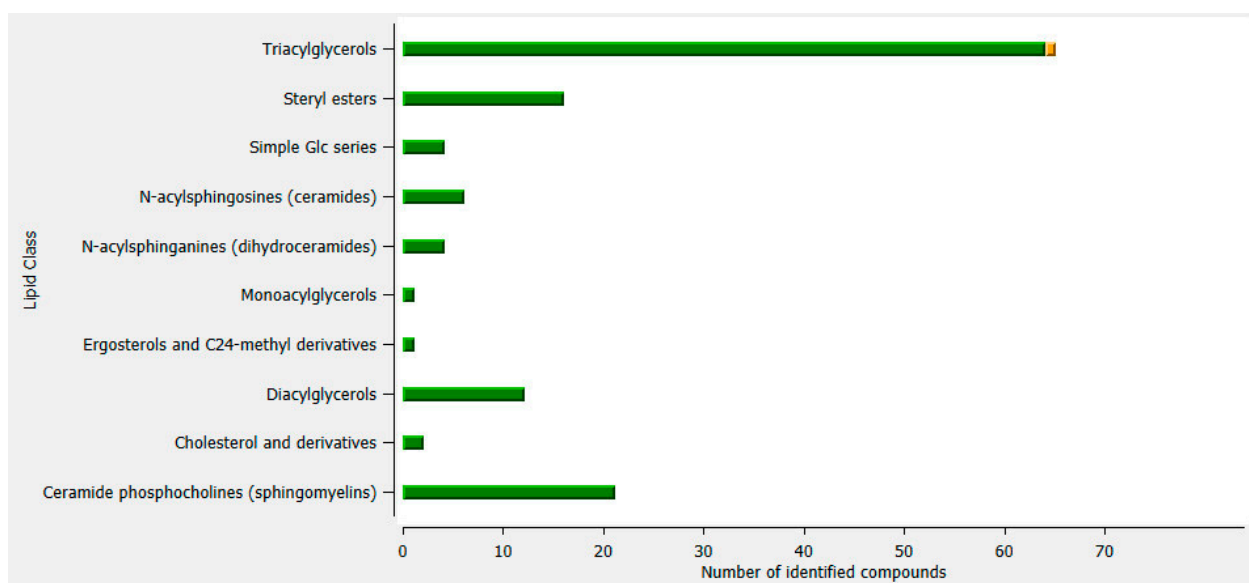

**Figure S2.** *Summary of molecular species identified in positive-ion mode.* This plot provides a histogram of the number of identified positive-ion features.

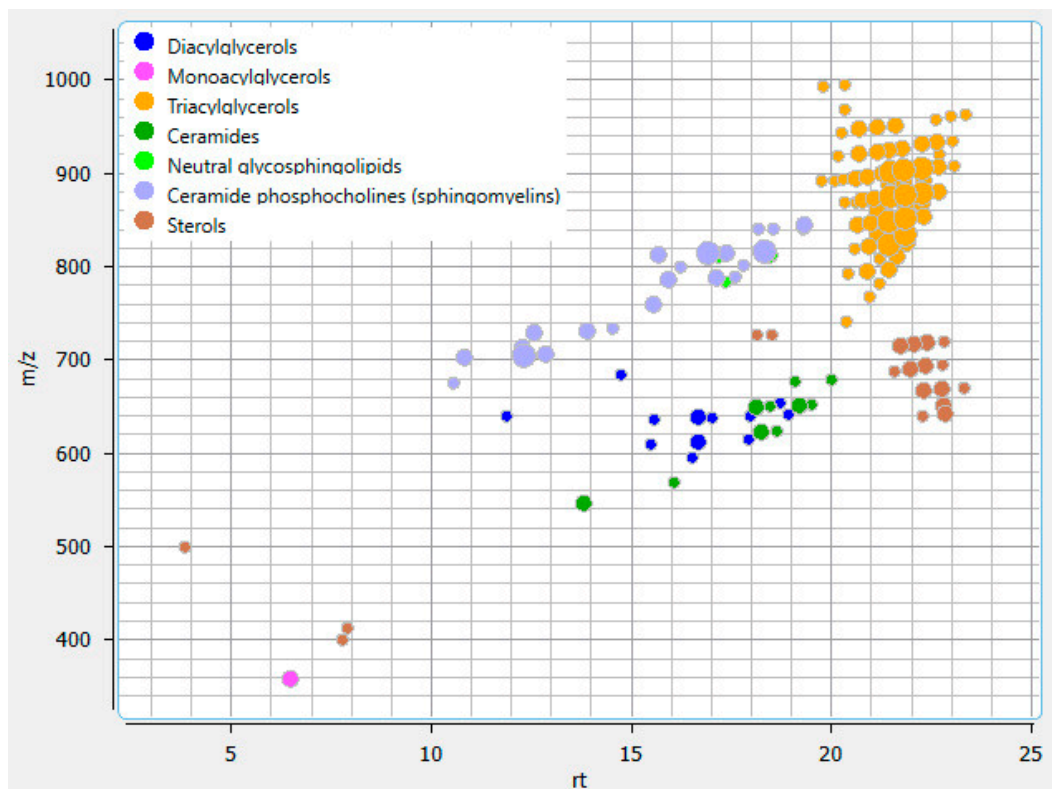

**Figure S3.** Mass-to-charge ratio ( $m/z$ ) vs retention time plot of positive ions. A visual overview of the identified peaks in positive-ion mode from all samples combined, color coded by lipid class. The size of the spots is proportional to their relative abundance as peak area ratio (analyte/internal standard).

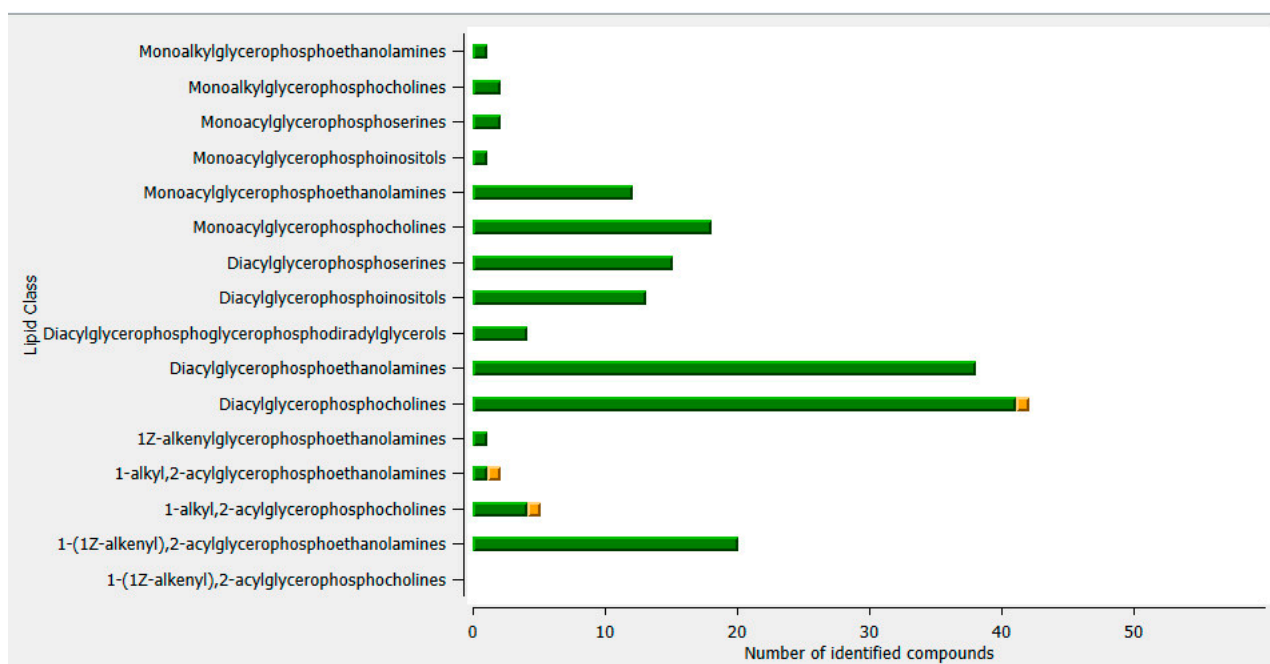

**Figure S4.** *Summary of molecular species identified in negative-ion mode.* This plot provides a histogram of the number of identified negative-ion features.

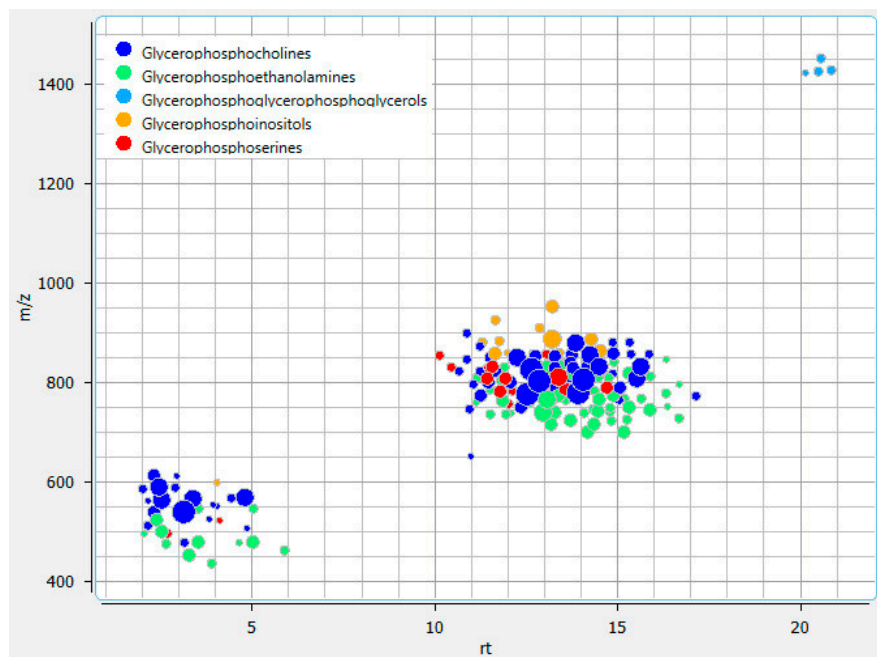

**Figure S5.** *Mass-to-charge ratio ( $m/z$ ) vs retention time plot of negative ions.* A visual overview of the identified peaks in negative-ion mode from all samples combined, color coded by lipid class. The size of the spots is proportional to their relative abundance as peak area ratio (analyte/internal standard).

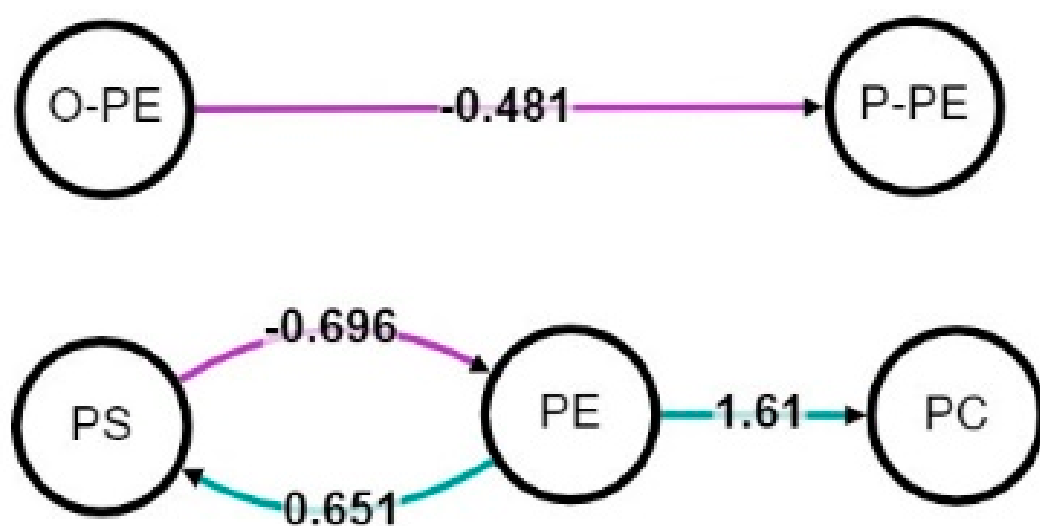

**Figure S6.** *Most active- and suppressed reaction and pathways.* A visual overview of most active and suppressed reaction and pathways between Pair-fed control and alcohol group as analyzed using LipidMaps.

**Table S1.** Numbers of Identified Molecular Species by Class and Subclass (Lipid Maps Classification).

| <b>Numbers of Identified Molecular Species by Class and Subclass (Lipid Maps Classification).</b> |           |
|---------------------------------------------------------------------------------------------------|-----------|
| <b>Ceramides</b>                                                                                  | <b>9</b>  |
| N-acylsphinganine (dihydroceramides)                                                              | 4         |
| N-acylsphingosine (ceramides)                                                                     | 5         |
| <b>Diacylglycerols (DG)</b>                                                                       | <b>11</b> |
| <b>Fatty Acids and Conjugates</b>                                                                 | <b>12</b> |
| Fatty acids                                                                                       | 9         |
| Hydroxy fatty acids                                                                               | 3         |
| <b>Glycerophosphocholines (PC)</b>                                                                | <b>65</b> |
| 1-alkyl,2-acylglycerophosphocholines                                                              | 5         |
| Diacylglycerophosphocholines                                                                      | 41        |
| Monoacylglycerophosphocholines                                                                    | 17        |
| Monoalkylglycerophosphocholines                                                                   | 2         |
| <b>Glycerophosphoethanolamines (PE)</b>                                                           | <b>76</b> |
| 1-(1Z-alkenyl),2-acylglycerophosphoethanolamines                                                  | 22        |
| 1-alkyl,2-acylglycerophosphoethanolamines                                                         | 2         |
| 1Z-alkenylglycerophosphoethanolamines                                                             | 1         |
| Diacylglycerophosphoethanolamines                                                                 | 38        |
| Monoacylglycerophosphoethanolamines                                                               | 12        |
| Monoalkylglycerophosphoethanolamines                                                              | 1         |
| <b>Glycerophosphoglycerophosphoglycerols (CL)</b>                                                 | <b>5</b>  |
| Diacylglycerophosphoglycerophosphodiradylglycerols                                                | 5         |
| <b>Glycerophosphoinositols (PI)</b>                                                               | <b>15</b> |

|                                                       |            |
|-------------------------------------------------------|------------|
| Diacylglycerophosphoinositols                         | 14         |
| Monoacylglycerophosphoinositols                       | 1          |
| <b>Glycerophosphoserines (PS)</b>                     | <b>17</b>  |
| Diacylglycerophosphoserines                           | 15         |
| Monoacylglycerophosphoserines                         | 2          |
| <b>Monoradylglycerols</b>                             | <b>1</b>   |
| <b>Neutral glycosphingolipids</b>                     | <b>4</b>   |
| Simple Glc series                                     | 4          |
| <b>Ceramide phosphocholines (sphingomyelins) (SM)</b> | <b>20</b>  |
| <b>Sterols</b>                                        | <b>16</b>  |
| Cholesterol and derivatives                           | 2          |
| Ergosterols and C24-methyl derivatives                | 1          |
| Steryl esters                                         | 13         |
| <b>Triacylglycerols (TG)</b>                          | <b>64</b>  |
|                                                       |            |
| <b>Total</b>                                          | <b>315</b> |



**Table S2.** Fold change and P-values in untargeted lipidomics.

| <b>Molecular Species</b>           | <b>Lipid Class</b>          | <b>Lipid Subclass</b>                | <b>p-Value</b> | <b>Fold Change</b> | <b>Obervation</b> |
|------------------------------------|-----------------------------|--------------------------------------|----------------|--------------------|-------------------|
| (20R22R)-2022-dihydroxycholesterol | Sterols                     | Cholesterol and derivatives          | 0.012964       | 0.72743348         | Upregulated       |
| LysoPE(0:0_20:5)                   | Glycerophosphoethanolamines | Monoacylglycerophosphoethanolamines  | 0.0398         | -0.34734184        | Downregulated     |
| PC(0:0_18:0)                       | Glycerophosphocholines      | Monoacylglycerophosphocholines       | 0.045674       | 0.24535438         | Upregulated       |
| PC(14:0_22:6)                      | Glycerophosphocholines      | Diacylglycerophosphocholines         | 0.02639        | -0.35053119        | Downregulated     |
| PC(16:0_18:2)                      | Glycerophosphocholines      | Diacylglycerophosphocholines         | 0.013561       | -0.18777102        | Downregulated     |
| PC(16:0_20:4)                      | Glycerophosphocholines      | Diacylglycerophosphocholines         | 0.048485       | -0.20923542        | Downregulated     |
| PC(16:0_20:5)                      | Glycerophosphocholines      | Diacylglycerophosphocholines         | 0.003056       | -0.42270341        | Downregulated     |
| PC(16:1_0:0)                       | Glycerophosphocholines      | Monoacylglycerophosphocholines       | 0.037247       | 0.14392127         | Upregulated       |
| PC(18:0_16:0)                      | Glycerophosphocholines      | Diacylglycerophosphocholines         | 0.045463       | -0.15145998        | Downregulated     |
| PC(18:0_18:2)                      | Glycerophosphocholines      | Diacylglycerophosphocholines         | 0.037057       | -0.14580984        | Downregulated     |
| PC(18:2_20:4)                      | Glycerophosphocholines      | Diacylglycerophosphocholines         | 0.027674       | -0.28097996        | Downregulated     |
| PC(20:4/20:4)                      | Glycerophosphocholines      | Diacylglycerophosphocholines         | 0.04594        | -0.33552687        | Downregulated     |
| PC(O-16:0/20:4)                    | Glycerophosphocholines      | 1-alkyl,2-acylglycerophosphocholines | 0.017634       | -0.25560261        | Downregulated     |
| PC(O-16:0/22:6)                    | Glycerophosphocholines      | 1-alkyl,2-acylglycerophosphocholines | 0.009509       | -0.27661442        | Downregulated     |
| PC(O-18:1/20:4)                    | Glycerophosphocholines      | 1-alkyl,2-acylglycerophosphocholines | 0.023766       | -0.246618          | Downregulated     |

|               |                             |                                   |          |             |               |
|---------------|-----------------------------|-----------------------------------|----------|-------------|---------------|
| PE(16:0_20:4) | Glycerophosphoethanolamines | Diacylglycerophosphoethanolamines | 0.044354 | -0.24356478 | Downregulated |
| PE(16:0_20:4) | Glycerophosphoethanolamines | Diacylglycerophosphoethanolamines | 0.049754 | -0.20929542 | Downregulated |
| PE(16:0_20:5) | Glycerophosphoethanolamines | Diacylglycerophosphoethanolamines | 0.004828 | -0.47743286 | Downregulated |
| PE(16:0_22:6) | Glycerophosphoethanolamines | Diacylglycerophosphoethanolamines | 0.030672 | -0.32819892 | Downregulated |
| PE(16:0_22:6) | Glycerophosphoethanolamines | Diacylglycerophosphoethanolamines | 0.040031 | -0.28477406 | Downregulated |
| PE(16:1_22:6) | Glycerophosphoethanolamines | Diacylglycerophosphoethanolamines | 0.013283 | -0.46351708 | Downregulated |
| PE(18:0_18:1) | Glycerophosphoethanolamines | Diacylglycerophosphoethanolamines | 0.041335 | -0.1524376  | Downregulated |
| PE(18:0_18:2) | Glycerophosphoethanolamines | Diacylglycerophosphoethanolamines | 0.011499 | -0.23996974 | Downregulated |
| PE(18:0_20:4) | Glycerophosphoethanolamines | Diacylglycerophosphoethanolamines | 0.004107 | -0.25884887 | Downregulated |
| PE(18:0_20:4) | Glycerophosphoethanolamines | Diacylglycerophosphoethanolamines | 0.004724 | -0.22722437 | Downregulated |
| PE(18:0_20:5) | Glycerophosphoethanolamines | Diacylglycerophosphoethanolamines | 0.036235 | -0.2780752  | Downregulated |
| PE(18:0_22:6) | Glycerophosphoethanolamines | Diacylglycerophosphoethanolamines | 0.010885 | -0.32176478 | Downregulated |
| PE(18:1_18:2) | Glycerophosphoethanolamines | Diacylglycerophosphoethanolamines | 0.020208 | -0.21192099 | Downregulated |
| PE(18:1_22:6) | Glycerophosphoethanolamines | Diacylglycerophosphoethanolamines | 0.047854 | -0.33152371 | Downregulated |
| PE(18:2_20:4) | Glycerophosphoethanolamines | Diacylglycerophosphoethanolamines | 0.024248 | -0.36132739 | Downregulated |
| PE(18:2_22:6) | Glycerophosphoethanolamines | Diacylglycerophosphoethanolamines | 0.041618 | -0.40113414 | Downregulated |
| PE(20:4_22:6) | Glycerophosphoethanolamines | Diacylglycerophosphoethanolamines | 0.035615 | -0.44986043 | Downregulated |

|                 |                             |                                                  |          |             |               |
|-----------------|-----------------------------|--------------------------------------------------|----------|-------------|---------------|
| PE(20:5_16:0)   | Glycerophosphoethanolamines | Diacylglycerophosphoethanolamines                | 0.030955 | -0.24061563 | Downregulated |
| PE(O-16:0/22:6) | Glycerophosphoethanolamines | 1-alkyl,2-acylglycerophosphoethanolamines        | 0.030865 | -0.29160853 | Downregulated |
| PE(O-18:1/0:0)  | Glycerophosphoethanolamines | Monoalkylglycerophosphoethanolamines             | 0.007393 | -0.23108903 | Downregulated |
| PE(P-16:0/0:0)  | Glycerophosphoethanolamines | 1Z-alkenylglycerophosphoethanolamines            | 0.029322 | -0.20061354 | Downregulated |
| PE(P-16:0/18:1) | Glycerophosphoethanolamines | 1-(1Z-alkenyl),2-acylglycerophosphoethanolamines | 0.032119 | -0.22589886 | Downregulated |
| PE(P-16:0/20:4) | Glycerophosphoethanolamines | 1-(1Z-alkenyl),2-acylglycerophosphoethanolamines | 0.012984 | -0.31033166 | Downregulated |
| PE(P-16:0/20:4) | Glycerophosphoethanolamines | 1-(1Z-alkenyl),2-acylglycerophosphoethanolamines | 0.010928 | -0.28311475 | Downregulated |
| PE(P-16:0/22:6) | Glycerophosphoethanolamines | 1-(1Z-alkenyl),2-acylglycerophosphoethanolamines | 0.027079 | -0.32547637 | Downregulated |
| PE(P-16:0/22:6) | Glycerophosphoethanolamines | 1-(1Z-alkenyl),2-acylglycerophosphoethanolamines | 0.047911 | -0.25926571 | Downregulated |
| PE(P-18:0/20:3) | Glycerophosphoethanolamines | 1-(1Z-alkenyl),2-acylglycerophosphoethanolamines | 0.012356 | -0.32018721 | Downregulated |
| PE(P-18:0/20:4) | Glycerophosphoethanolamines | 1-(1Z-alkenyl),2-acylglycerophosphoethanolamines | 0.005856 | -0.33531187 | Downregulated |
| PE(P-18:0/20:4) | Glycerophosphoethanolamines | 1-(1Z-alkenyl),2-acylglycerophosphoethanolamines | 0.011697 | -0.27707214 | Downregulated |
| PE(P-18:0/20:5) | Glycerophosphoethanolamines | 1-(1Z-alkenyl),2-acylglycerophosphoethanolamines | 0.00315  | -0.43788169 | Downregulated |
| PE(P-18:0/22:4) | Glycerophosphoethanolamines | 1-(1Z-alkenyl),2-acylglycerophosphoethanolamines | 0.007697 | -0.32657583 | Downregulated |
| PE(P-18:0/22:4) | Glycerophosphoethanolamines | 1-(1Z-alkenyl),2-acylglycerophosphoethanolamines | 0.025418 | -0.37745622 | Downregulated |

|                 |                             |                                                  |          |             |               |
|-----------------|-----------------------------|--------------------------------------------------|----------|-------------|---------------|
| PE(P-18:0/22:6) | Glycerophosphoethanolamines | 1-(1Z-alkenyl),2-acylglycerophosphoethanolamines | 0.006499 | -0.39577869 | Downregulated |
| PE(P-18:0/22:6) | Glycerophosphoethanolamines | 1-(1Z-alkenyl),2-acylglycerophosphoethanolamines | 0.005225 | -0.37582648 | Downregulated |
| PE(P-18:1/22:6) | Glycerophosphoethanolamines | 1-(1Z-alkenyl),2-acylglycerophosphoethanolamines | 0.018287 | -0.35844567 | Downregulated |
| PE(P-18:1/22:6) | Glycerophosphoethanolamines | 1-(1Z-alkenyl),2-acylglycerophosphoethanolamines | 0.041576 | -0.32612134 | Downregulated |
| PI(16:0_20:4)   | Glycerophosphoinositols     | Diacylglycerophosphoinositols                    | 0.005886 | -0.28668304 | Downregulated |
| PI(16:0_20:4)   | Glycerophosphoinositols     | Diacylglycerophosphoinositols                    | 0.043766 | -0.2255854  | Downregulated |
| PI(16:0_22:6)   | Glycerophosphoinositols     | Diacylglycerophosphoinositols                    | 0.020681 | -0.30522366 | Downregulated |
| PI(18:0_18:2)   | Glycerophosphoinositols     | Diacylglycerophosphoinositols                    | 0.024881 | -0.20172803 | Downregulated |
| PI(18:0_20:4)   | Glycerophosphoinositols     | Diacylglycerophosphoinositols                    | 0.001674 | -0.26621007 | Downregulated |
| PI(18:0_20:4)   | Glycerophosphoinositols     | Diacylglycerophosphoinositols                    | 0.006659 | -0.22088965 | Downregulated |
| PS(18:0_18:1)   | Glycerophosphoserines       | Diacylglycerophosphoserines                      | 0.033526 | -0.12873491 | Downregulated |
| SM(d16:1/24:1)  | Phosphosphingolipids        | Ceramide phosphocholines (sphingomyelins)        | 0.000163 | -0.26465766 | Downregulated |
| SM(d17:1/24:1)  | Phosphosphingolipids        | Ceramide phosphocholines (sphingomyelins)        | 0.041579 | 0.16872072  | Upregulated   |
| SM(d18:0/22:0)  | Phosphosphingolipids        | Ceramide phosphocholines (sphingomyelins)        | 0.008956 | -0.20435751 | Downregulated |
| SM(d18:1/16:1)  | Phosphosphingolipids        | Ceramide phosphocholines (sphingomyelins)        | 0.001477 | -0.14477802 | Downregulated |
| SM(d24:1/18:1)  | Phosphosphingolipids        | Ceramide phosphocholines (sphingomyelins)        | 0.008518 | -0.19497704 | Downregulated |

|                    |                      |                                           |          |              |               |
|--------------------|----------------------|-------------------------------------------|----------|--------------|---------------|
| SM(d26:1/18:1)     | Phosphosphingolipids | Ceramide phosphocholines (sphingomyelins) | 0.008063 | - 0.26221638 | Downregulated |
| TG(14:0_18:1_22:6) | Triradylglycerols    | Triacylglycerols                          | 0.028989 | - 0.3373549  | Downregulated |
| TG(15:0_16:0_16:0) | Triradylglycerols    | Triacylglycerols                          | 0.008912 | 0.1138037    | Upregulated   |
| TG(16:0_16:0_17:0) | Triradylglycerols    | Triacylglycerols                          | 0.007499 | 0.12622925   | Upregulated   |
| TG(16:0_18:1_22:6) | Triradylglycerols    | Triacylglycerols                          | 0.029267 | - 0.34209496 | Downregulated |
| TG(16:1_18:1_22:6) | Triradylglycerols    | Triacylglycerols                          | 0.028843 | - 0.32733661 | Downregulated |
| TG(18:0_18:2_22:6) | Triradylglycerols    | Triacylglycerols                          | 0.033527 | - 0.31243992 | Downregulated |
| TG(18:1_22:6_22:6) | Triradylglycerols    | Triacylglycerols                          | 0.036958 | - 0.46729967 | Downregulated |
| TG(18:2_18:2_22:6) | Triradylglycerols    | Triacylglycerols                          | 0.006824 | - 0.41903541 | Downregulated |
| TG(18:2_22:6_22:6) | Triradylglycerols    | Triacylglycerols                          | 0.038133 | - 0.53840984 | Downregulated |

**Table S3.** Fold change and P-values in targeted lipidomics.

| Component Name | P-value     | Fold Change  | Observation   |
|----------------|-------------|--------------|---------------|
| PA(16:0_20:5)  | 0.004879315 | -0.414634146 | Downregulated |
| PA(16:1_20:4)  | 0.023067617 | -0.325       | Downregulated |
| PA(18:1_20:5)  | 0.049735563 | -0.333333333 | Downregulated |
| PE(16:0_20:5)  | 0.007511166 | -0.404661017 | Downregulated |
| PE(16:1_20:5)  | 0.012034365 | -0.427083333 | Downregulated |
| PE(16:0e/20:5) | 0.001828191 | -0.4375      | Downregulated |
| PE(16:1e/20:5) | 0.001940685 | -0.469255663 | Downregulated |
| PE(18:0_18:0)  | 0.03805855  | -0.239215686 | Downregulated |
| PE(18:0_18:2)  | 0.007746768 | -0.116662238 | Downregulated |
| PE(18:0_20:4)  | 0.041206605 | -0.13469405  | Downregulated |
| PE(18:0_20:5)  | 0.012861419 | -0.362790698 | Downregulated |
| PE(18:0e/18:1) | 0.028582587 | 0.081833061  | Upregulated   |
| PE(18:0e/20:5) | 0.009465852 | -0.409937888 | Downregulated |
| PE(18:1_20:5)  | 0.007487479 | -0.376822717 | Downregulated |
| PE(18:1e/18:2) | 0.039205499 | -0.203021719 | Downregulated |
| PE(18:1e/20:5) | 0.003679739 | -0.440940012 | Downregulated |
| PE(18:2_18:2)  | 0.036143541 | -0.246846847 | Downregulated |
| PE(18:2_20:4)  | 0.048753052 | -0.244867301 | Downregulated |
| PE(18:2_20:5)  | 0.040247574 | -0.330357143 | Downregulated |
| PE(20:4_20:5)  | 0.033730391 | -0.333333333 | Downregulated |

|                |             |              |               |
|----------------|-------------|--------------|---------------|
| PC(16:0_20:5)  | 0.005599484 | -0.393558523 | Downregulated |
| PC(16:1_20:5)  | 0.006270164 | -0.409638554 | Downregulated |
| PC(16:0e/20:5) | 0.00250644  | -0.400327869 | Downregulated |
| PC(18:0_20:5)  | 0.005949119 | -0.403100775 | Downregulated |
| PC(18:0e/20:5) | 0.035129931 | -0.352544451 | Downregulated |
| PC(18:1_20:5)  | 0.013834941 | -0.351515152 | Downregulated |
| PC(18:1e/20:5) | 0.019542988 | -0.382       | Downregulated |
| PC(18:2_20:5)  | 0.004675328 | -0.510948905 | Downregulated |
| PG(16:0_16:0)  | 0.007120571 | 1.630434783  | Upregulated   |
| PG(16:0_18:0)  | 0.017171256 | 1.476683938  | Upregulated   |
| PG(16:0_18:1)  | 0.003240316 | 1.62221515   | Upregulated   |
| PG(16:0_18:2)  | 0.003528504 | 1.251336898  | Upregulated   |
| PG(16:0_18:3)  | 0.039968524 | 0.6          | Upregulated   |
| PG(16:0_20:3)  | 0.001109672 | 1.444444444  | Upregulated   |
| PG(16:0_20:4)  | 0.004680048 | 1.452830189  | Upregulated   |
| PG(16:0_22:6)  | 0.000446351 | 1.4          | Upregulated   |
| PG(18:0_18:0)  | 0.014063722 | 1.25         | Upregulated   |
| PG(18:0_18:1)  | 0.000614993 | 1.664772727  | Upregulated   |
| PG(18:0_18:2)  | 0.001030603 | 1.666666667  | Upregulated   |
| PG(18:0_18:3)  | 0.003949773 | 4            | Upregulated   |
| PG(18:0_20:3)  | 0.001164968 | 1.833333333  | Upregulated   |

|               |             |              |               |
|---------------|-------------|--------------|---------------|
| PG(18:0_20:4) | 0.038170949 | 1.625        | Upregulated   |
| PG(18:1_18:1) | 0.004730356 | 2.02173913   | Upregulated   |
| PG(18:1_18:2) | 0.000502474 | 2            | Upregulated   |
| PG(18:1_20:4) | 0.002060314 | 2.375        | Upregulated   |
| PG(18:2_18:2) | 0.000763792 | 2.285714286  | Upregulated   |
| PG(20:4_20:4) | 0.033730391 | 0.857142857  | Upregulated   |
| PI(18:0_18:1) | 0.009366305 | 0.166945566  | Upregulated   |
| PI(18:0_20:5) | 0.011172497 | -0.338854879 | Downregulated |
| PI(20:5_OH)   | 0.03119884  | -0.606584821 | Downregulated |
| PS(16:0_20:5) | 0.002668482 | -0.446969697 | Downregulated |
| PS(18:0_18:0) | 0.033077894 | -0.158944659 | Downregulated |
| PS(18:0_18:1) | 0.018227462 | -0.16382282  | Downregulated |
| PS(18:0_20:5) | 0.005581885 | -0.434013605 | Downregulated |
| PS(18:1_20:5) | 0.008125641 | -0.362573099 | Downregulated |
| PS(18:2_22:6) | 0.023500536 | -0.321705426 | Downregulated |
